# Supplementary material
Source: HighWire-hosted journal article supplement (https://bmjmedicine.bmj.com/highwire/filestream/231/field_highwire_adjunct_files/0/bmjmed-2021-000081supp001_data_supplement.pdf)
Supplement: bmjmed-2021-000081supp001_data_supplement.pdf [file bmjmed-2021-000081supp001_data_supplement.pdf]

## Supplementary

### Appendix 1. Definition of CVD History

A previous history of CVD or heart failure was defined as: a) a hospital admission for CVD or heart failure recorded between 1 January 1988 and 31 December 2011 according to the International Classification of Disease 9 (ICD-9) and International Classification of Disease - 10-Australian Modification (ICD-10-AM) listed below; or b) dispensing of loop diuretics (frusemide or bumetanide) or metolazone between 1 July 2006 and 31 December 2006. Loop diuretics are uncommonly used for conditions other than heart failure in New Zealand.

The following ICD 9 codes were used to identify a hospitalisation for CVD or heart failure between 1 January 1988 and 30 June 2001:

‘A\_’ -Diagnosis codes:

412, 430, 431, 436, 438, 4111, 4131, 4139, 4148, 4149, 4230, 4275, 4280, 4281, 4289, 4292, 4295, 4296, 4353, 4358, 4359, 4370, 4376, 4378, 4379, 4400, 4401, 4408, 4409, 4411, 4413, 4414, 4415, 4416, 4439, 4440, 4441, 4449, 25070, 25071, 36234, 40291, 40491, 40493, 41011, 41041, 41071, 41081, 41091, 41181, 41189, 41400, 41401, 41402, 41403, 41411, 41419, 42971, 42979, 43300, 43310, 43320, 43330, 43380, 43390, 43391, 43400, 43401, 43411, 43490, 43491, 44020, 44021, 44022, 44023, 44024, 44100, 44101, 44102, 44103, 44421, 44422, 44481, 44489

‘O\_’ -Operation/procedure codes:

3572, 3601, 3603, 3605, 3606, 3607, 3611, 3612, 3613, 3614, 3615, 3616, 3699, 3732, 3800, 3810, 3812, 3814, 3815, 3816, 3818, 3820, 3832, 3836, 3842, 3844, 3846, 3848, 3869, 3922, 3925, 3926, 3928, 3929, 3952, 3956, 3957, 3959, 3999

‘V\_’ -Supplementary classification/health factors:

V434, V4581, V4582

The ICD-10AM codes used to identify a history of CVD or heart failure between 1 July 2001 and 31 December 2011 are:

| Diagnosis                    | ICD-10-AM codes                                                                                                                                                                                                                                                                                                                                                                                                                                                                                                                                                                                                                                                                                                                                                                                                                                                                                                                                                                                                                                                                                                                                           |
|------------------------------|-----------------------------------------------------------------------------------------------------------------------------------------------------------------------------------------------------------------------------------------------------------------------------------------------------------------------------------------------------------------------------------------------------------------------------------------------------------------------------------------------------------------------------------------------------------------------------------------------------------------------------------------------------------------------------------------------------------------------------------------------------------------------------------------------------------------------------------------------------------------------------------------------------------------------------------------------------------------------------------------------------------------------------------------------------------------------------------------------------------------------------------------------------------|
| Myocardial infarction        | I210, I211 - I214, I219 - I221, I228, I229                                                                                                                                                                                                                                                                                                                                                                                                                                                                                                                                                                                                                                                                                                                                                                                                                                                                                                                                                                                                                                                                                                                |
| Unstable angina              | I200                                                                                                                                                                                                                                                                                                                                                                                                                                                                                                                                                                                                                                                                                                                                                                                                                                                                                                                                                                                                                                                                                                                                                      |
| Other coronary heart disease | I201, I208, I209, I230- I236, I238, I240, I248, I249, I250- I256, I258, I259, I2510-I2513, I460, I469                                                                                                                                                                                                                                                                                                                                                                                                                                                                                                                                                                                                                                                                                                                                                                                                                                                                                                                                                                                                                                                     |
| Ischaemic stroke             | I630 - I636, I638, I639, I64, I660-4, I668, I669, I693, I694, I698                                                                                                                                                                                                                                                                                                                                                                                                                                                                                                                                                                                                                                                                                                                                                                                                                                                                                                                                                                                                                                                                                        |
| Haemorrhagic stroke          | I600 - I616, I618, I619, I690, I691                                                                                                                                                                                                                                                                                                                                                                                                                                                                                                                                                                                                                                                                                                                                                                                                                                                                                                                                                                                                                                                                                                                       |
| Transient ischaemic attack   | G450 - G453, G458 - G468                                                                                                                                                                                                                                                                                                                                                                                                                                                                                                                                                                                                                                                                                                                                                                                                                                                                                                                                                                                                                                                                                                                                  |
| Peripheral vascular disease  | E1050 - E1052, E1059, E1150 - E1152, E1159, E1451, E1452, E1459, I650-I653, I658, I659, I670, I7020, I7021 - I7024, I7100 - I7103, I711, I713, I715, I718, I739 - I745, I748, I749                                                                                                                                                                                                                                                                                                                                                                                                                                                                                                                                                                                                                                                                                                                                                                                                                                                                                                                                                                        |
| Congestive heart failure     | I110, I130, I132, I50, I500, I501, I509                                                                                                                                                                                                                                                                                                                                                                                                                                                                                                                                                                                                                                                                                                                                                                                                                                                                                                                                                                                                                                                                                                                   |
| CVD-related procedures       | 3270000 - 3270011, 3270300, 3270800 - 3270803, 3271200, 3271201, 3271500 - 3271503, 3271800, 3271801, 3273000, 3273001, 3273300, 3273301, 3273600, 3273900, 3274200, 3274500, 3274800, 3275100, 3275101 - 3275103, 3275400 - 3275402, 3275700, 3275701, 3276300 - 3276314, 3276316 - 3276319, 3305000, 3305500, 3307500, 3308000, 3310000, 3311200, 3311500, 3311800, 3312100, 3312400, 3312700, 3313000, 3315100, 3315400, 3315700, 3316000, 3316300, 3317800, 3318100, 3350000, 3350600, 3350601, 3350900, 3351200, 3351500, 3351501, 3351800, 3352100, 3352400, 3352700, 3353000, 3353001, 3353300, 3353600, 3353900, 3354200, 3354800, 3354801, 3354802, 3354803, 3355100, 3355400, 3530306, 3530307, 3530400, 3530401, 3530500, 3530501, 3530906, 3530907, 3530908, 3530909, 3531000, 3531001, 3531002, 3531003, 3531004, 3531005, 3531200, 3531201, 3531500, 3531501, 3845619, 3849700, 3849701, 3849702, 3849703, 3849704, 3849705, 3849706, 3849707, 3850000, 3850001, 3850002, 3850003, 3850004, 3850300, 3850301, 3850302, 3850303, 3850304, 3850500, 3850700, 3850800, 3850900, 3863700, 9020100, 9020101, 9020102, 9020103, 9022900, 9023000, |
| Other                        | I672, I700, I701, I708, I709, I714, Z951, Z955, Z958, Z959                                                                                                                                                                                                                                                                                                                                                                                                                                                                                                                                                                                                                                                                                                                                                                                                                                                                                                                                                                                                                                                                                                |

Haemorrhagic stroke and heart failure are included in the CVD definition for a range of reasons.

Firstly, most vascular risk factors are also risk factors for haemorrhagic stroke and heart failure.

In addition, heart failure is frequently the first hospitalised presentation of ischaemic heart disease if ischaemic disease has previously manifest as silent myocardial infarction or as angina which was managed in the community. Coding and indeed diagnosis of heart failure aetiology

can be difficult so it has been common practice to include heart failure of any cause, and it would also be difficult to justify someone requiring hospitalisation for heart failure as not having CVD. There has been diagnostic uncertainty in the past between haemorrhagic vs ischaemic stroke, and ICD-10 coding can be equally ambiguous. The proportion of strokes that are haemorrhagic is low, so consistent with other groups using routinely collected health data for research, we chose to include haemorrhagic in the definition of stroke.

**Supplementary Table 1.** Adjusted hazard ratios for fatal or first non-fatal CVD events within 5 years in women and men without adjustment for gout or gout-associated predictors

|                                                                                                                                                                                                                                                                                                                                                                                                                                                                                                                                                                                                                                     | Women            | Men              |
|-------------------------------------------------------------------------------------------------------------------------------------------------------------------------------------------------------------------------------------------------------------------------------------------------------------------------------------------------------------------------------------------------------------------------------------------------------------------------------------------------------------------------------------------------------------------------------------------------------------------------------------|------------------|------------------|
| Predictor                                                                                                                                                                                                                                                                                                                                                                                                                                                                                                                                                                                                                           |                  |                  |
| <b>Age Bands</b>                                                                                                                                                                                                                                                                                                                                                                                                                                                                                                                                                                                                                    |                  |                  |
| < 40                                                                                                                                                                                                                                                                                                                                                                                                                                                                                                                                                                                                                                | 0.25 (0.23-0.28) | 0.22 (0.20-0.24) |
| 40-49                                                                                                                                                                                                                                                                                                                                                                                                                                                                                                                                                                                                                               | 1                | 1                |
| 50-59                                                                                                                                                                                                                                                                                                                                                                                                                                                                                                                                                                                                                               | 1.86 (1.73-2.00) | 2.02 (1.91-2.13) |
| 60-69                                                                                                                                                                                                                                                                                                                                                                                                                                                                                                                                                                                                                               | 3.67 (3.42-3.94) | 3.28 (3.10-3.46) |
| 70-79                                                                                                                                                                                                                                                                                                                                                                                                                                                                                                                                                                                                                               | 7.72 (7.19-8.29) | 5.84 (5.51-6.18) |
| <b>Ethnicity</b>                                                                                                                                                                                                                                                                                                                                                                                                                                                                                                                                                                                                                    |                  |                  |
| Māori                                                                                                                                                                                                                                                                                                                                                                                                                                                                                                                                                                                                                               | 1.83 (1.73-1.94) | 1.62 (1.54-1.71) |
| New Zealand European                                                                                                                                                                                                                                                                                                                                                                                                                                                                                                                                                                                                                | 1                | 1                |
| Pacific peoples                                                                                                                                                                                                                                                                                                                                                                                                                                                                                                                                                                                                                     | 1.32 (1.24-1.41) | 1.21 (1.14-1.28) |
| Indian                                                                                                                                                                                                                                                                                                                                                                                                                                                                                                                                                                                                                              | 1.00 (0.92-1.10) | 1.25 (1.17-1.33) |
| Chinese                                                                                                                                                                                                                                                                                                                                                                                                                                                                                                                                                                                                                             | 0.61 (0.55-0.68) | 0.53 (0.48-0.58) |
| Other <sup>a</sup>                                                                                                                                                                                                                                                                                                                                                                                                                                                                                                                                                                                                                  | 0.74 (0.67-0.82) | 0.73 (0.67-0.79) |
| <b>Deprivation quintile (per quintile)</b>                                                                                                                                                                                                                                                                                                                                                                                                                                                                                                                                                                                          | 1.11 (1.10-1.13) | 1.10 (1.09-1.11) |
| <b>Diabetes</b>                                                                                                                                                                                                                                                                                                                                                                                                                                                                                                                                                                                                                     | 1.94 (1.82-2.07) | 1.96 (1.85-2.07) |
| <b>Atrial fibrillation <sup>b</sup></b>                                                                                                                                                                                                                                                                                                                                                                                                                                                                                                                                                                                             | 2.05 (1.85-2.27) | 1.51 (1.38-1.64) |
| <b>Medication dispensing <sup>c</sup></b>                                                                                                                                                                                                                                                                                                                                                                                                                                                                                                                                                                                           |                  |                  |
| Blood pressure lowering                                                                                                                                                                                                                                                                                                                                                                                                                                                                                                                                                                                                             | 1.87 (1.79-1.97) | 1.55 (1.49-1.61) |
| Lipid lowering                                                                                                                                                                                                                                                                                                                                                                                                                                                                                                                                                                                                                      | 0.93 (0.89-0.98) | 0.96 (0.92-1.00) |
| Antiplatelet                                                                                                                                                                                                                                                                                                                                                                                                                                                                                                                                                                                                                        | 1.28 (1.22-1.35) | 1.18 (1.13-1.24) |
| Anticoagulation                                                                                                                                                                                                                                                                                                                                                                                                                                                                                                                                                                                                                     | 1.41 (1.24-1.61) | 1.43 (1.30-1.58) |
| <i>Cox-proportional hazards model for fatal or first non-fatal CVD events adjusted for age, ethnicity, level of deprivation, history of diabetes, hospitalisation for atrial fibrillation and dispensing of blood pressure lowering, lipid lowering, antiplatelet and anticoagulant medications. <sup>a</sup> includes non-Chinese and non-Indian Asian, Middle Eastern, Latin American, African and others not specified. <sup>b</sup> hospitalisation for atrial fibrillation (primary or secondary diagnosis). <sup>c</sup> dispensing of these medications at least once in the previous 6 months prior to 1 January 2012..</i> |                  |                  |

**Supplementary Table 2.** The interaction between ethnicity and gout and their association with CVD events (Model 1).

**a) Men**

|                                                                                                                                                                                                                                                                                                                               |                      | No interaction term |             |                | Interaction with gout |             |                |
|-------------------------------------------------------------------------------------------------------------------------------------------------------------------------------------------------------------------------------------------------------------------------------------------------------------------------------|----------------------|---------------------|-------------|----------------|-----------------------|-------------|----------------|
|                                                                                                                                                                                                                                                                                                                               |                      | Hazard ratio        | Coefficient | Standard error | Hazard ratio          | Coefficient | Standard error |
| Ethnicity                                                                                                                                                                                                                                                                                                                     | New Zealand European | 1                   | -           | -              | 1                     | -           | -              |
|                                                                                                                                                                                                                                                                                                                               | Māori                | 1.59                | 0.463307    | 0.026836       | 1.58                  | 0.455047    | 0.029910       |
|                                                                                                                                                                                                                                                                                                                               | Pacific peoples      | 1.18                | 0.161817    | 0.029340       | 1.18                  | 0.164186    | 0.033327       |
|                                                                                                                                                                                                                                                                                                                               | Indian               | 1.25                | 0.225279    | 0.034606       | 1.22                  | 0.200144    | 0.036445       |
|                                                                                                                                                                                                                                                                                                                               | Chinese              | 0.53                | -0.635920   | 0.050054       | 0.51                  | -0.670349   | 0.053316       |
|                                                                                                                                                                                                                                                                                                                               | Other                | 0.73                | -0.319622   | 0.041001       | 0.69                  | -0.365529   | 0.043809       |
| Gout                                                                                                                                                                                                                                                                                                                          |                      | 1.18                | 0.163144    | 0.024462       | 1.12                  | 0.110410    | 0.034854       |
| Interaction                                                                                                                                                                                                                                                                                                                   | Māori                | -                   | -           | -              | 1.06                  | 0.062667    | 0.062789       |
|                                                                                                                                                                                                                                                                                                                               | Pacific              | -                   | -           | -              | 1.03                  | 0.026732    | 0.063009       |
|                                                                                                                                                                                                                                                                                                                               | Indian               | -                   | -           | -              | 1.30                  | 0.261960    | 0.111105       |
|                                                                                                                                                                                                                                                                                                                               | Chinese              | -                   | -           | -              | 1.38                  | 0.324610    | 0.154597       |
|                                                                                                                                                                                                                                                                                                                               | Other                | -                   | -           | -              | 1.53                  | 0.426641    | 0.123109       |
| Summary                                                                                                                                                                                                                                                                                                                       |                      |                     |             |                |                       |             |                |
| With gout                                                                                                                                                                                                                                                                                                                     | Māori                | 1.87 (1.75, 2.00)   | 0.62645     | 0.0339         | 1.87 (1.71, 2.06)     | 0.62812     | 0.0481         |
|                                                                                                                                                                                                                                                                                                                               | Pacific              | 1.38 (1.29, 1.48)   | 0.32496     | 0.0351         | 1.35 (1.23, 1.48)     | 0.30133     | 0.0471         |
|                                                                                                                                                                                                                                                                                                                               | Indian               | 1.47 (1.36, 1.60)   | 0.38842     | 0.0428         | 1.77 (1.45, 2.16)     | 0.57251     | 0.0101         |
|                                                                                                                                                                                                                                                                                                                               | Chinese              | 0.62 (0.56, 0.70)   | -0.47278    | 0.0559         | 0.79 (0.60, 1.04)     | -0.23533    | 0.1420         |
|                                                                                                                                                                                                                                                                                                                               | Other                | 0.86 (0.78, 0.94)   | -0.15648    | 0.0478         | 1.19 (0.95, 1.48)     | 0.17152     | 0.1112         |
| Without gout                                                                                                                                                                                                                                                                                                                  | Māori                | 1.59                |             |                | 1.58                  |             |                |
|                                                                                                                                                                                                                                                                                                                               | Pacific              | 1.18                |             |                | 1.18                  |             |                |
|                                                                                                                                                                                                                                                                                                                               | Indian               | 1.25                |             |                | 1.22                  |             |                |
|                                                                                                                                                                                                                                                                                                                               | Chinese              | 0.53                |             |                | 0.51                  |             |                |
|                                                                                                                                                                                                                                                                                                                               | Other                | 0.73                |             |                | 0.69                  |             |                |
| All coefficients and hazard ratios are adjusted for all other variables in the risk model however only the relevant subset are shown here. The 95% CIs around the total effects including the interaction term calculated from standard errors that have assumed independence between the three contributing standard errors. |                      |                     |             |                |                       |             |                |

b) Women

|                                                                                                                                                                                                                                                                                                                               |                      | No interaction term |             |                | Interaction with gout |             |                |
|-------------------------------------------------------------------------------------------------------------------------------------------------------------------------------------------------------------------------------------------------------------------------------------------------------------------------------|----------------------|---------------------|-------------|----------------|-----------------------|-------------|----------------|
|                                                                                                                                                                                                                                                                                                                               |                      | Hazard ratio        | Coefficient | Standard error | Hazard ratio          | Coefficient | Standard error |
| Ethnicity                                                                                                                                                                                                                                                                                                                     | New Zealand European | 1                   | -           | -              | 1                     | -           | -              |
|                                                                                                                                                                                                                                                                                                                               | Māori                | 1.79                | 0.582542    | 0.029874       | 1.83                  | 0.603552    | 0.030945       |
|                                                                                                                                                                                                                                                                                                                               | Pacific peoples      | 1.29                | 0.255390    | 0.033173       | 1.31                  | 0.268637    | 0.034770       |
|                                                                                                                                                                                                                                                                                                                               | Indian               | 1.00                | 0.004505    | 0.046976       | 1.00                  | 0.003103    | 0.048110       |
|                                                                                                                                                                                                                                                                                                                               | Chinese              | 0.61                | -0.494157   | 0.053714       | 0.61                  | -0.487570   | 0.054621       |
|                                                                                                                                                                                                                                                                                                                               | Other                | 0.74                | -0.305667   | 0.052197       | 0.74                  | -0.307619   | 0.053404       |
| Gout                                                                                                                                                                                                                                                                                                                          |                      | 1.34                | 0.291862    | 0.041270       | 1.53                  | 0.426032    | 0.066181       |
| Interaction                                                                                                                                                                                                                                                                                                                   | Māori                | -                   | -           | -              | 0.76                  | -0.273721   | 0.102284       |
|                                                                                                                                                                                                                                                                                                                               | Pacific              | -                   | -           | -              | 0.82                  | -0.193339   | 0.100054       |
|                                                                                                                                                                                                                                                                                                                               | Indian               | -                   | -           | -              | 1.00                  | -0.003305   | 0.215391       |
|                                                                                                                                                                                                                                                                                                                               | Chinese              | -                   | -           | -              | 0.83                  | -0.187161   | 0.300766       |
|                                                                                                                                                                                                                                                                                                                               | Other                | -                   | -           | -              | 1.03                  | 0.031361    | 0.250049       |
| Summary                                                                                                                                                                                                                                                                                                                       |                      |                     |             |                |                       |             |                |
| With gout                                                                                                                                                                                                                                                                                                                     | Māori                | 2.40 (2.18, 2.63)   | 0.874404    | 0.0482         | 2.13 (1.83, 2.48)     | 0.755863    | 0.0768         |
|                                                                                                                                                                                                                                                                                                                               | Pacific              | 1.73 (1.57, 1.91)   | 0.547252    | 0.0499         | 1.65 (1.43, 1.91)     | 0.501323    | 0.0732         |
|                                                                                                                                                                                                                                                                                                                               | Indian               | 1.34 (1.19, 1.52)   | 0.296367    | 0.0626         | 1.53 (1.03, 2.27)     | 0.42583     | 0.2009         |
|                                                                                                                                                                                                                                                                                                                               | Chinese              | 0.82 (0.72, 0.93)   | -0.202295   | 0.0677         | 0.78 (0.44, 1.37)     | -0.248699   | 0.2891         |
|                                                                                                                                                                                                                                                                                                                               | Other                | 0.99 (0.87, 1.12)   | -0.013805   | 0.0662         | 1.16 (0.73, 1.85)     | 0.149774    | 0.2363         |
| Without gout                                                                                                                                                                                                                                                                                                                  | Māori                | 1.79                |             |                | 1.83                  |             |                |
|                                                                                                                                                                                                                                                                                                                               | Pacific              | 1.29                |             |                | 1.31                  |             |                |
|                                                                                                                                                                                                                                                                                                                               | Indian               | 1.00                |             |                | 1.00                  |             |                |
|                                                                                                                                                                                                                                                                                                                               | Chinese              | 0.61                |             |                | 0.61                  |             |                |
|                                                                                                                                                                                                                                                                                                                               | Other                | 0.74                |             |                | 0.74                  |             |                |
| All coefficients and hazard ratios are adjusted for all other variables in the risk model however only the relevant subset are shown here. The 95% CIs around the total effects including the interaction term calculated from standard errors that have assumed independence between the three contributing standard errors. |                      |                     |             |                |                       |             |                |
